# Supplementary material for: Interweaving of multilevel carbon networks with mesoporous TiO2 for lithium-ion battery anodes
Source: Royal Society of Chemistry journal article supplement (doi:10.1039/c3ra44177f), 2013-01-01
Supplement: c3ra44177f.pdf [file c3ra44177f.pdf]

## Electronic Supplementary Information

### Interweaving of multilevel carbon networks with mesoporous TiO<sub>2</sub> for lithium-ion battery anodes

Zixia Lin, Mingbo Zheng,\* Bin Zhao, Lijia Pan, Lin Pu and Yi Shi\*

Nanjing National Laboratory of Microstructures, School of Electronic Science and Engineering,  
Nanjing University, Nanjing 210093, China.

\* Corresponding Author. E-mail addresses: zhengmingbo@nju.edu.cn; yshi@nju.edu.cn

Tel.: 86-25-83621220; fax: 86-25-83621220.

### Experimental

*Synthesis of thermally-exfoliated graphene (TEG):* Graphite oxide (GO) was prepared from natural graphite powders (universal grade, 99.985%) according to a modified Hummers method. Dried GO was thermally exfoliated at 300 °C for 3 min in air, and subsequently treated at 900 °C for 3 h in Ar atmosphere. The obtained sample was denoted as TEG.

*Synthesis of nanocomposite:* 0.47 g of Pluronic P123 (EO<sub>20</sub>PO<sub>70</sub>EO<sub>20</sub>) was first dissolved in 10 mL of ethanol. Then, 0.28 g of TiCl<sub>4</sub> and 1.18 g of titanium isopropoxide (TPT) were added in the solution. On the other hand, 0.05 g of TEG was added into 10 mL of ethanol. After ultrasonic for 30min, the TEG suspension was added into the above P123/TiCl<sub>4</sub>/TPT ethanol solution. The mixture solution was magnetically stirred for 2 h. The final solution was poured into a petri dish and evaporated in air overnight. The obtained TiO<sub>2</sub>/P123/TEG composite material was subsequently treated in Ar at 500 °C for 5 hours.

*Synthesis of mesoporous TiO<sub>2</sub>:* 0.47 g of Pluronic P123 (EO<sub>20</sub>PO<sub>70</sub>EO<sub>20</sub>) was first dissolved in 10 mL of ethanol. Then 0.28 g of TiCl<sub>4</sub> and 1.18 g of TPT were

added in the solution. The solution was magnetically stirred for 2 h. The final solution was poured into a petri dish and evaporated in air overnight. The obtained TiO<sub>2</sub>/P123 composite material was subsequently treated in Ar at 500 °C for 5 hours.

*Synthesis of simplex TiO<sub>2</sub>*: 0.28 g of TiCl<sub>4</sub> and 1.18 g of TPT were added in 10 mL of ethanol. The solution was magnetically stirred for 2 h. The final solution was poured into a petri dish and evaporated in air overnight. The obtained material was subsequently treated in air at 500 °C for 5 hours.

*Characterization*: X-ray powder diffraction (XRD) patterns were recorded on a Bruker D8 powder X-ray diffractometer (Germany). The morphologies of the samples were observed by a scanning electron microscopy (SEM) system (Hitachi S-4800) and a transmission electron microscopy (TEM) system (JEOL, JEM-2100). N<sub>2</sub> adsorption-desorption analysis was performed using a Micromeritics ASAP 2010 instrument. Thermal analysis was performed on NETZSCH STA 409C thermal analyzer (Germany), in which the sample was heated in alumina crucible in air to 800 °C at a heating rate of 10 °C min<sup>-1</sup>.

*Lithium-ion battery performance measurement*: Electrochemical measurements were performed using 2032-type coin cells. For the nanocomposite, 80 wt% active material, 10 wt% carbon black, and 10 wt% polyvinylidene fluoride binder were mixed with N-methylpyrrolidone. The obtained slurry was coated onto a copper foil current collector and dried in vacuum at 80 °C for 12 h. Then the electrode was cut into disks (12 mm in diameter) and further dried in vacuum at 80 °C for 12 h. The loading of the tested electrodes in our experiments is around 1.5 mg cm<sup>-2</sup>. The coin cells were assembled in an Ar-filled glove-box using an active material as the working electrode, a Li foil as the reference and counter electrode, 1 M LiPF<sub>6</sub> in ethylene carbonate and diethyl carbonate (1:1 vol) as the electrolyte, and Celgard 2250 film as the separator. Charge-discharge measurements were carried out galvanostatically using a battery testing system (LAND, Wuhan Jinnuo Electronics. Ltd.) and the potential window was controlled between 1.0 and 3.0 V at room temperature. 80% of the weight of loading film in the electrode was used to estimate the specific capacity of the batteries. Full cell with LiFePO<sub>4</sub> as the cathode and the nanocomposite as the anode was also

assembled in the same argon-filled glove-box. The  $\text{LiFePO}_4$  sample was prepared via Wang's method.<sup>1</sup> The tested cathode was prepared using similar methods as that of the anode slurry. The resultant  $\text{LiFePO}_4$  slurry was uniformly pasted onto alumina foil and dried in vacuum. The loading of the  $\text{LiFePO}_4$  electrode in our experiments is around  $2.5 \text{ mg cm}^{-2}$ . In the full cell,  $\text{LiFePO}_4$  is slightly excesses over nanocomposite. The full cell was tested between 0.1 and 3 V and the specific capacity is calculated based on the mass of the nanocomposite.

### Figures:

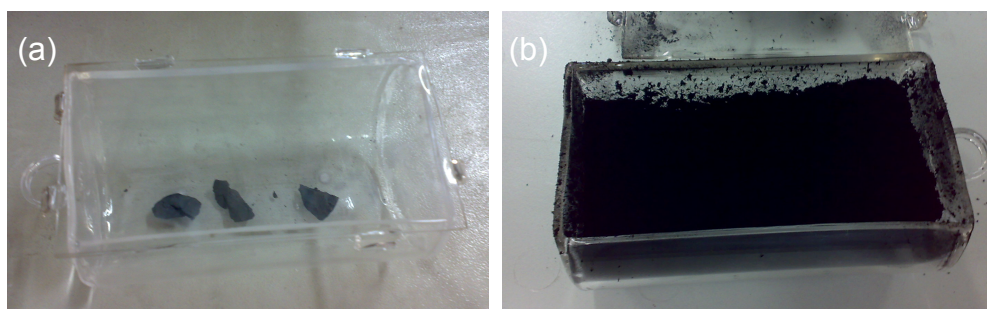

**Fig. S1.** The photos of (a) GO and (b) TEG. After the thermal exfoliation, the sample has a huge variation in volume.

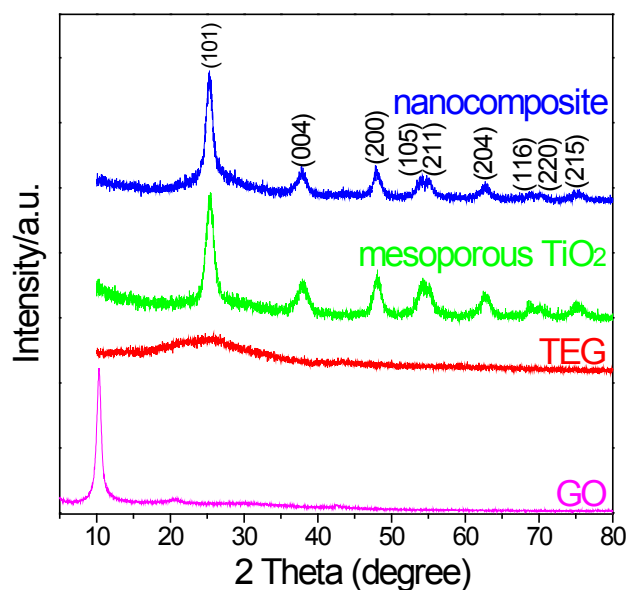

**Fig. S2.** XRD patterns of GO, TEG, mesoporous  $\text{TiO}_2$ , and nanocomposite (anatase  $\text{TiO}_2$ , JCPDS File Card No. 21-1272)

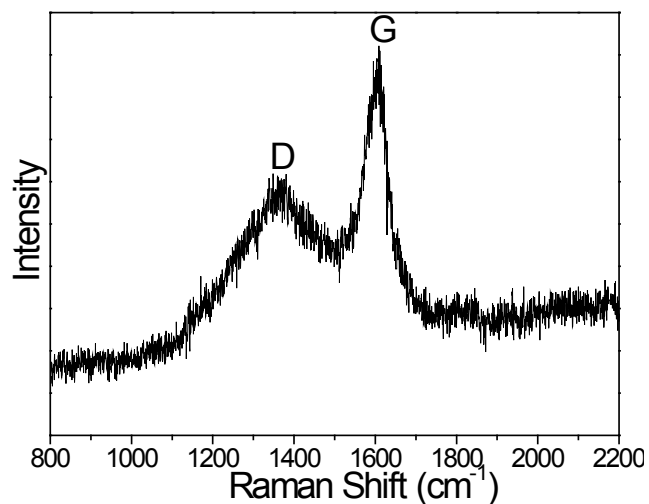

**Fig. S3.** Raman spectrum of mesoporous TiO<sub>2</sub>. Mesoporous TiO<sub>2</sub> is obtained by heating the TiO<sub>2</sub>/P123 composite material in Ar at 500 °C for 5 h. Two prominent peaks are obtained at 1365 and 1600 cm<sup>-1</sup> for mesoporous TiO<sub>2</sub>, and these peaks correspond to the D and G bands of amorphous carbon. Amorphous carbon is formed by the carbonization of P123 micelles during heat treatment.

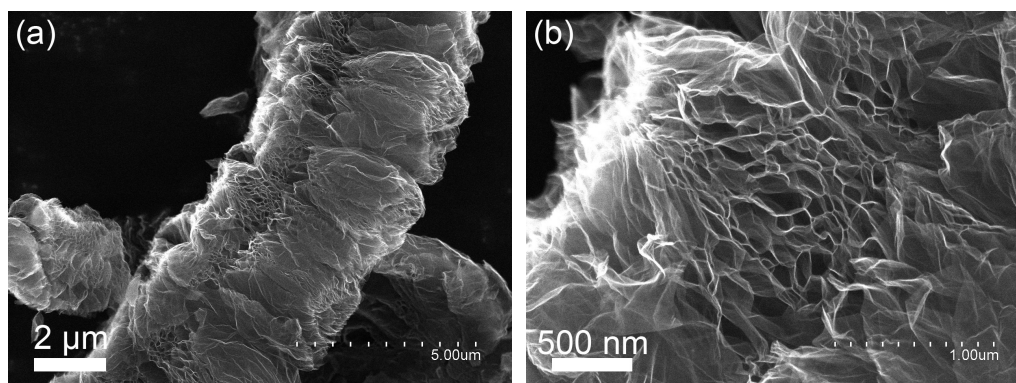

**Fig. S4.** SEM images of TEG. The TEG sample is composed of micron-sized particles and has a nanosheet structure resulting from the decomposition of the oxygen-containing groups of GO during the thermal exfoliation process.

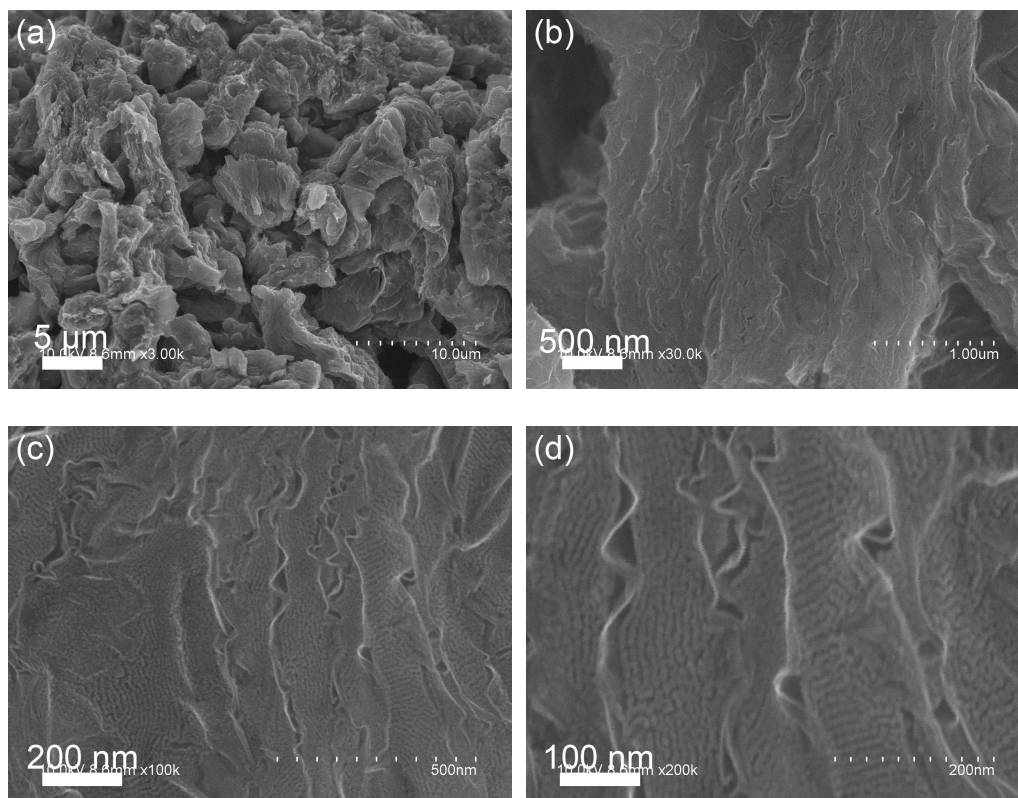

**Fig. S5.** SEM images of the nanocomposite at different magnifications. Figure a shows that the nanocomposite is composed of micron-sized particles. Figure b-d show that the mesoporous TiO<sub>2</sub> and graphene nanosheets form the three-dimensional continuous complex structure.

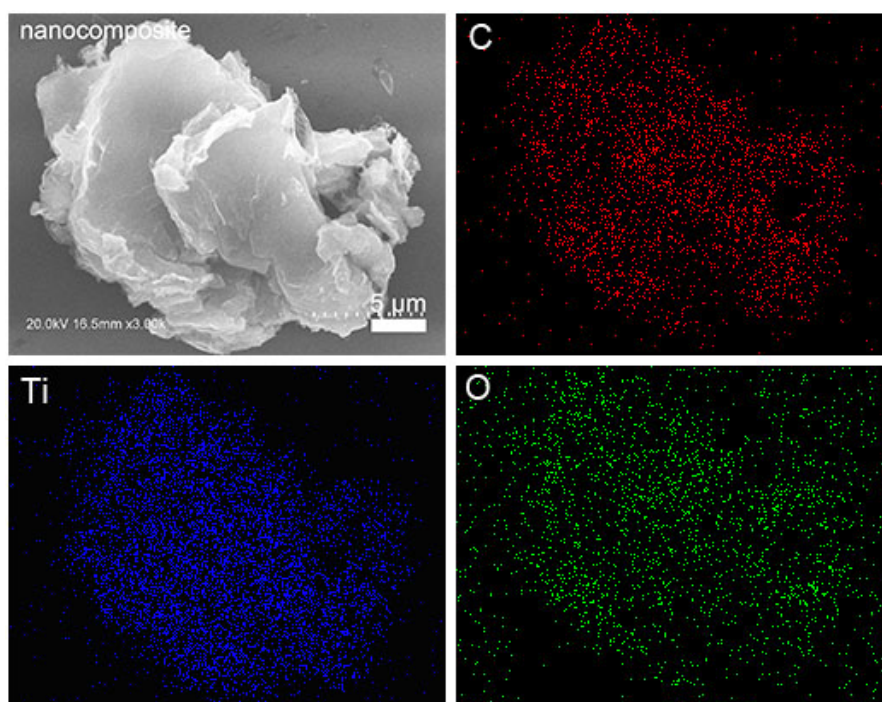

**Fig. S6.** SEM image and corresponding carbon, titanium, and oxygen elemental mapping of the nanocomposite

**Reference:**

- [1] Y. Wang, Y. Wang, E. Hosono, K. Wang, H. Zhou. *Angewandte Chemie International Edition* 2008, **47**, 7461.
